# Supplementary material for: Eukaryotic association module in phage WO genomes from Wolbachia
Source: Nat Commun. 2016 Oct 11;7:13155. doi: 10.1038/ncomms13155 (PMC5062602; doi:10.1038/ncomms13155)
Supplement: Supplementary Information — Supplementary Figures 1-4, Supplementary Tables 1-4 [file ncomms13155-s1.pdf]

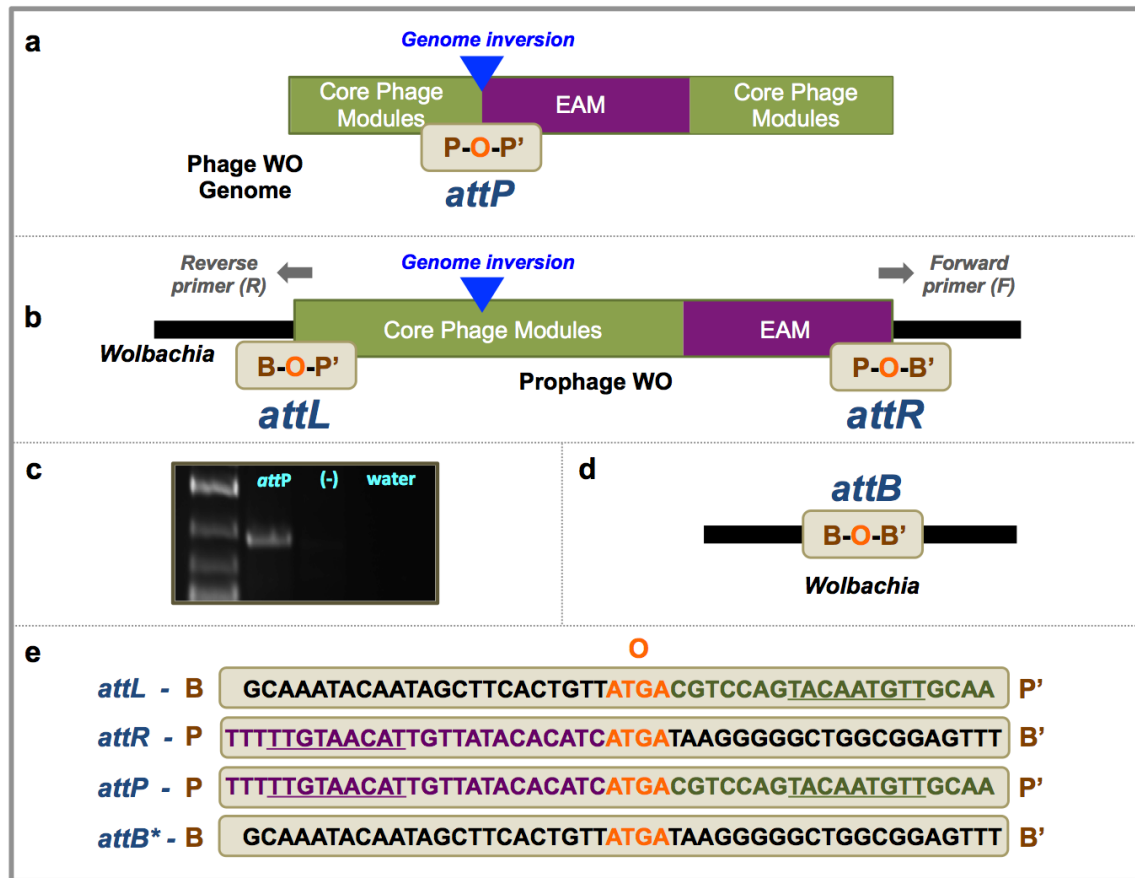

**Supplementary Figure 1 | Sequencing reveals the phage, prophage and bacterial *att* sites for WOVitA1.** (a) The complete phage WOVitA1 genome encodes a eukaryotic association module (EAM, purple) and phage attachment site (*attP*) embedded within core phage structural modules (green). (b) The entire phage WO genome, including all core phage modules and the EAM, is inverted (blue triangles) and integrated into the *Wolbachia* chromosome as prophage WO. Attachment sites are designated as BOP' (*attL*) and POB' (*attR*) with B representing 'bacterial' and P representing 'phage'-associated nucleotides. Gray arrows indicate the direction of PCR primers used to amplify the (c) phage attachment (*attP*) site, designated as POP' in the linear WOVitA1 genome. (d) The bacterial attachment site (*attB*) is designated as BOB' on the *Wolbachia* chromosome. (e) All four *att* sites share a common region, O. Underlined nucleotides represent an inverted repeat region. \*The *attB* site was predicted based on the *attL* and *attR* sequences. A BLASTN search of this sequence identified the putative *attB* site as a non-coding, repetitive sequence in closely related *Wolbachia* taxa lacking the WOVitA1 infection (e.g., wAu, wMel, and wRi).

**a**

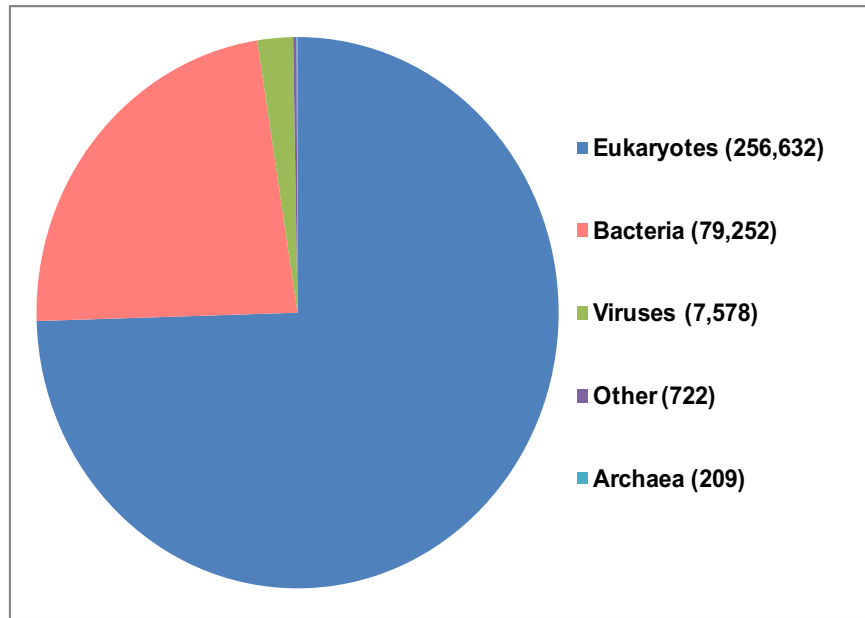

**b**

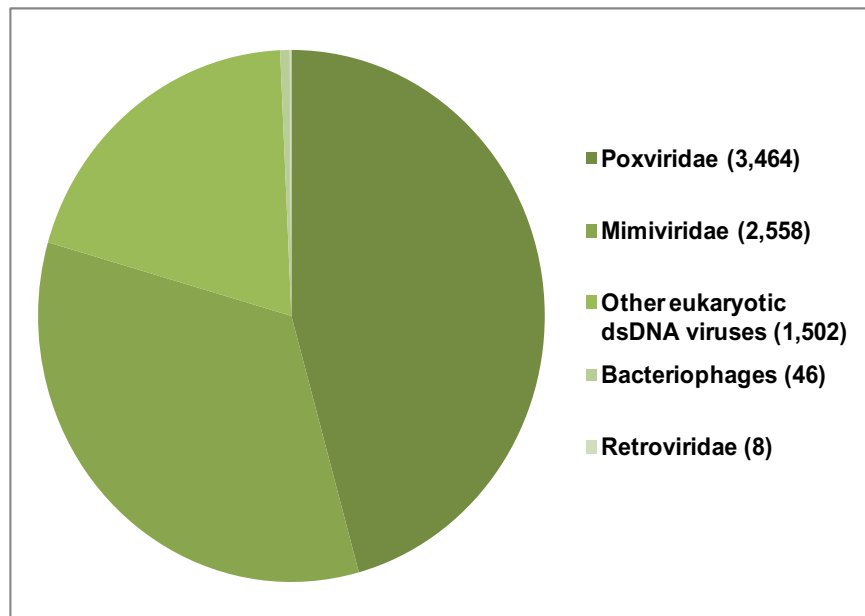

**Supplementary Figure 2 | Ankyrin repeat domain.** (a) The ankyrin domain is most commonly associated with eukaryotes as determined by a taxonomic search of the domain in NCBI's protein database. "Other" refers to synthetically-engineered constructs and metagenomic sequences. (b) Of the viral proteins that contain an ankyrin repeat, the majority are associated with either *Poxviridae* or *Mimiviridae*. This analysis does not include prophage regions within bacterial chromosomes.

**a**

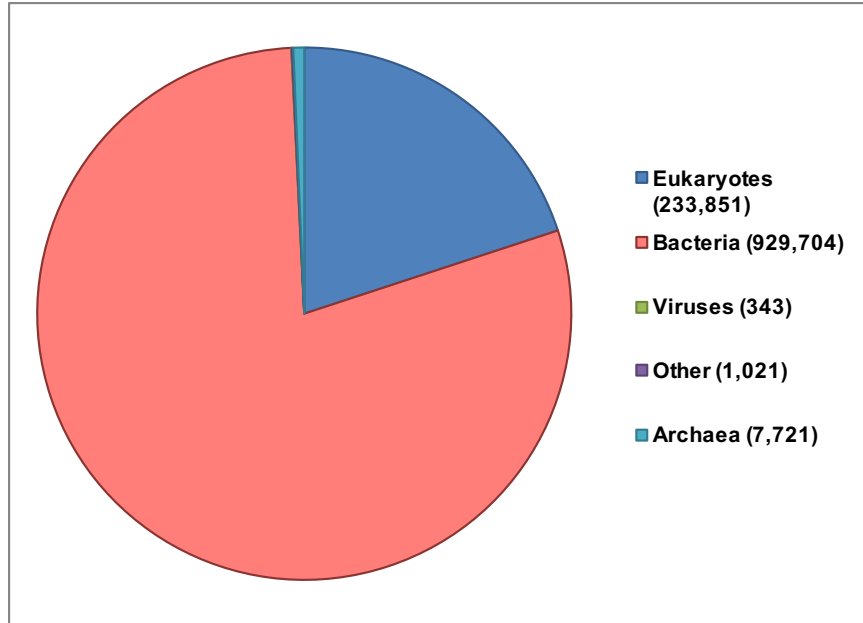

**b**

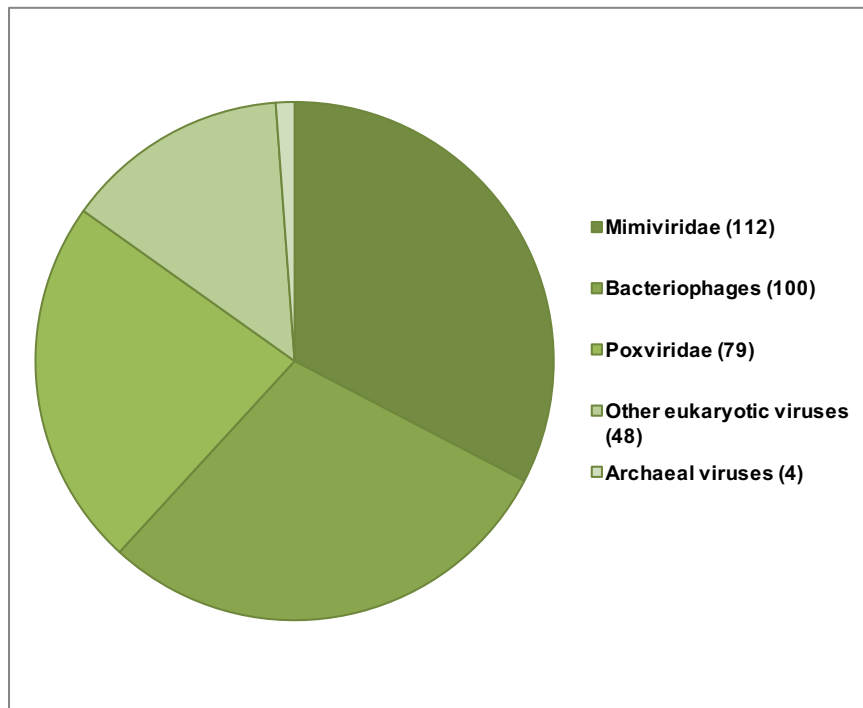

**Supplementary Figure 3 | TPR domain.** (a) The TPR domain is most commonly associated with bacteria as determined by a taxonomic search of the domain in NCBI's protein database. "Other" refers to synthetically-engineered constructs and metagenomic sequences. (b) The majority of viral proteins are associated with *Mimiviridae*. This analysis does not include prophage regions within bacterial chromosomes.

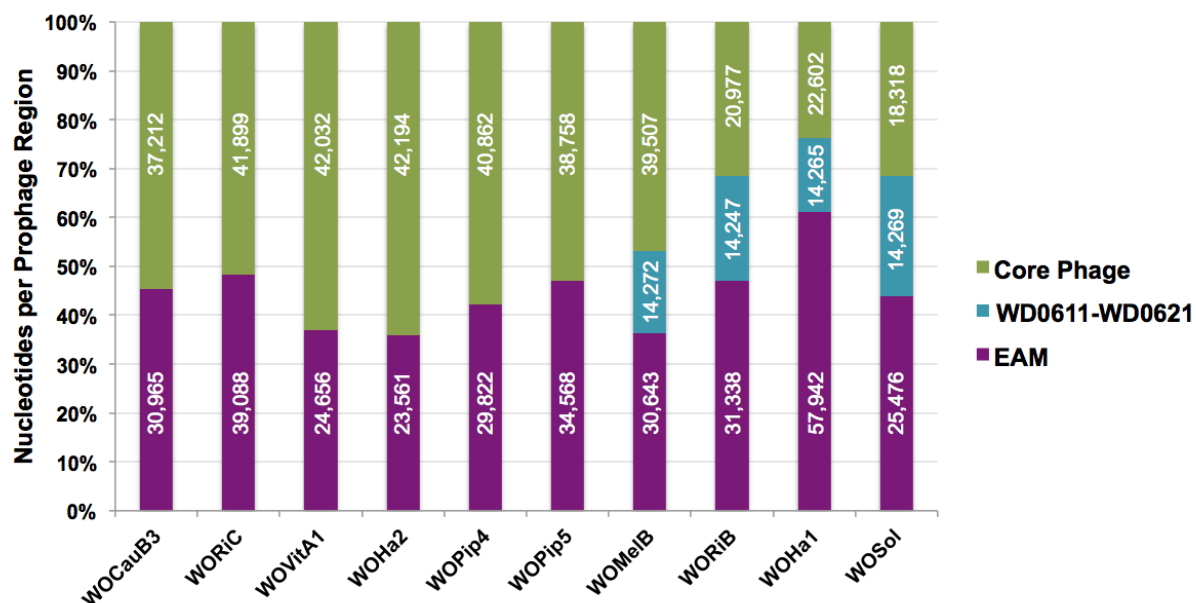

**Supplementary Figure 4 | Prophage WO dedicates nearly half of its genome to eukaryotic host association.** This chart shows the relative amount of nucleotides comprising the EAM, conserved WD0611-WD0621 cluster, and Core Phage Regions for ten prophage WO haplotypes. The absolute number of nucleotides is labeled in white. The Core Phage Region is defined as the region from recombinase to patatin.

**Supplementary Table 1 | *Wolbachia* and phage WO nomenclature.** Each w refers to a specific *Wolbachia* strain followed by an insect identifier. Each phage haplotype is indicated with (1) a WO- prefix, (2) insect identifier, and (3) specific haplotype identifier (1-5 or A, B, C). For example, WOVitA1 is phage WO haplotype #1 infecting the *Wolbachia* strain, wVitA. (\*) wCauB is native to *Cadra cautella* and was transferred to *Ephestia kuehniella* prior to sequencing phage particles.

| PHAGE WO | WOLBACHIA | INSECT                                         |
|----------|-----------|------------------------------------------------|
| WOAlbB   | wAlbB     | <i>Aedes albopictus</i>                        |
| WOAnaC   | wAna      | <i>Drosophila ananassae</i>                    |
| WOAu     | wAu       | <i>Drosophila simulans</i> str. Au             |
| WOBol1-b | wBol1-b   | <i>Hypolimnas bolina</i>                       |
| WOCauB2  | wCauB*    | <i>Ephestia kuehniella</i>                     |
| WOCauB3  | wCauB*    | <i>Ephestia kuehniella</i>                     |
| WODi     | wDi       | <i>Diaphorina citri</i>                        |
| WOOB     | wOb       | <i>Operophtera brumata</i>                     |
| WOPip1   | wPip      | <i>Culex pipiens quinquefasciatus</i> str. Pel |
| WOPip2   | wPip      | <i>Culex pipiens quinquefasciatus</i> str. Pel |
| WOPip3   | wPip      | <i>Culex pipiens quinquefasciatus</i> str. Pel |
| WOPip4   | wPip      | <i>Culex pipiens quinquefasciatus</i> str. Pel |
| WOPip5   | wPip      | <i>Culex pipiens quinquefasciatus</i> str. Pel |
| WOPipJHB | wPipJHB   | <i>Culex pipiens quinquefasciatus</i> str. JHB |
| WOPipMol | wPipMol   | <i>Culex molestus</i>                          |
| WORiC    | wRi       | <i>Drosophila simulans</i> str. Riverside      |
| WOSuziC  | wSuzi     | <i>Drosophila suzukii</i>                      |
| WOVitA1  | wVitA     | <i>Nasonia vitripennis</i>                     |
| WOVitA2  | wVitA     | <i>Nasonia vitripennis</i>                     |
| WOVitB   | wVitB     | <i>Nasonia vitripennis</i>                     |
|          | wBm       | <i>Brugia malayi</i>                           |
|          | wCle      | <i>Cimex lectularius</i>                       |
|          | wOo       | <i>Onchocerca ochengi</i>                      |

**Supplementary Table 2 | Comparative genomics of prophage WO.** All intact prophage WO genomes contain a bacteriophage-like region (termed the “Core Phage Region”) either adjacent to or flanked by a EAM region, listed with corresponding locus tags. Locus tags followed by (T) indicate that they are flanking transposases and may or may not be part of the prophage region. The (WD0611-WD0621)-like region represents a highly conserved cluster of bacterial genes with a broad range of metabolic function and transport potential. na, not applicable.

| PROPHAGE GENOME | CORE PHAGE REGION                                     | EAM REGION                                                                   | (WD0611-WD0621)-like      |
|-----------------|-------------------------------------------------------|------------------------------------------------------------------------------|---------------------------|
| WOVitA1         | gww_1104-gww_1156                                     | gww_1089-gww_1103                                                            | na                        |
| WOVitA2         | gww_426-gww_459                                       | gww_458-gww_472;<br>gww_484-gww_496                                          | gww_473-<br>gww_483       |
| WOVitA4         | gww_146-gww_175                                       | gww_131-gww_145(T); gww_176-gww_178                                          | na                        |
| WOCauB2         | gp1-gp45                                              | gp46-( <i>partial sequence</i> )                                             | na                        |
| WOCauB3         | gp1-gp44                                              | gp45-GF2gp25                                                                 | na                        |
| WOSol           | So0001-So0022                                         | wSo0003(T)-wSo0014; So0023-So0025;<br>So0026-wSo0028(T)                      | wSo0015-<br>wSo0026       |
| WOMelA          | WD0259-WD0288                                         | WD0289-WD0296(T); WD0253(T)-WD0258                                           | na                        |
| WOMelB          | WD0634-WD0647(T);<br>WD0563(T) - WD0604               | WD0605-WD0610;<br>WD0622-WD0633                                              | WD0611-<br>WD0621         |
| wMel WO-Island  | na                                                    | WD0507-WD0514                                                                | na                        |
| WOPip1          | WP0236(T)-WP0272                                      | WP0273-WP0293                                                                | na                        |
| WOPip2          | WP0297-WP0322                                         | WP0294-WP0296                                                                | na                        |
| WOPip3          | WP0323-WP0342                                         | WP0343(T)-WP0354                                                             | na                        |
| WOPip4          | WP0411-WP0455                                         | WP0405(T)-WP0410; WP0456-WP0465                                              | na                        |
| WOPip5          | WP1294(T)-WP1340                                      | WP1289(T)-WP1293; WP1341-WP1352(T)                                           | na                        |
| WORiA           | wRi_012450-wRi_012680(T)                              | na                                                                           | na                        |
| WORiB           | wRi_005400-wRi_005660                                 | wRi_005310(T)-wRi_005390; wRi_005670-wRi_005720;<br>wRi_005860-wRi_005930(T) | wRi_005730-<br>wRi_005830 |
| WORiB(2)        | wRi_010060-wRi_010320                                 | wRi_009980(T)-wRi_010050; wRi_010330-wRi_010380;<br>wRi_010500-wRi_010580(T) | wRi_010390-<br>wRi_010490 |
| WORiC           | wRi_006880-wRi_007230(T);<br>wRi_007550-wRi_007660(T) | wRi_006620-wRi_006870                                                        | na                        |
| WOHa1           | wHa_02360-wHa_02620                                   | wHa_02010(T)-wHa_02050; wHa_02170-wHa_02350;<br>wHa_02630-wHa_02760(T)       | wHa_02060-<br>wHa_02160   |
| WOHa2           | wHa_03390-wHa_03840                                   | wHa_03850-wHa_03930                                                          | na                        |
| WONo1           | wNo_01400-wNo01060                                    | wNo_01000(T)-wNo_01050(T)                                                    | na                        |
| WONo2           | wNo_07170(T)-<br>wNo_07380(T)                         | na                                                                           | na                        |
| WONo3           | wNo_09000-wNo_09120                                   | wNo_09130-wNo_09150(T)                                                       | na                        |
| WONo4           | wNo_10070(T)-wNo_10280                                | wNo_10290-wNo_10350                                                          | na                        |
| wNo WO-Islands  | na                                                    | wNo_01980-wNo_1990; wNo_2110-wNo_02200;<br>wNo_05070-wNo_05150(T)            | wNo_2000-<br>wNo_2100     |

**Supplementary Table 3 | Phage WO EAM furin cleavage sites.** Genes with predicted furin cleavage sites, indicative of potential host-induced protein modification, were identified within every prophage WO EAM.

| GENOME         | EAM FURIN CLEAVAGE                                                                              |
|----------------|-------------------------------------------------------------------------------------------------|
| WOCauB2        | <i>(partial sequence)</i>                                                                       |
| WOCauB3        | gp45, GF2gp18-GF2gp22                                                                           |
| WOSol          | wSo0011, So0023, So0025                                                                         |
| WOMelA         | WD0257-WD0258                                                                                   |
| WOMelB         | WD0610, WD0630-WD0632                                                                           |
| wMel WO-Island | WD0512-WD0514                                                                                   |
| WOPip1         | WP0280, WP0283, WP0290, WP0292-WP0293                                                           |
| WOPip2         | WP0294, WP0319-WP0320                                                                           |
| WOPip3         | WP0338                                                                                          |
| WOPip4         | WP0407, WP0410, WP0428, WP0433, WP0457, WP0460, WP0462-WP0463                                   |
| WOPip5         | WP1291, WP1341, WP1344, WP1346, WP1349, WP1351                                                  |
| WORiA          | <i>(haplotype does not have an EAM)</i>                                                         |
| WORiB          | wRi_005330, wRi_005360, wRi_005670, wRi_005720                                                  |
| WORiB(2)       | wRi_009990, wRi_010020, wRi_010330, wRi_010380, wRi_010570                                      |
| WORiC          | wRi_006630-wRi_006660, wRi_006740                                                               |
| WOVitA1        | gww_1095                                                                                        |
| WOVitA2        | gww_464, gww_484, gww_489, gww_491-gww_495                                                      |
| WOVitA4        | gww_134, gww_141-gww_142, gww_144-gww_145                                                       |
| WOHa1          | wHa_02170, wHa_02200, wHa_02290, wHa_02350, wHa_02690, wHa_02730                                |
| WOHa2          | wHa_03920                                                                                       |
| WONo1          | wNo_01030, wNo_01060                                                                            |
| WONo2          | <i>(haplotype does not have an EAM)</i>                                                         |
| WONo3          | wNo_09000, wNo_09080, wNo_09140                                                                 |
| WONo4          | wNo_10290, wNo_10320-wNo_10340                                                                  |
| wNo WO-Islands | wNo_01990, wNo_02030, wNo_02070, wNo_02120, wNo_02130, wNo_05080-wNo_05090, wNo_05110-wNo_05130 |

**Supplementary Table 4 | The phage WO PRANC domain shares amino acid homology with multiple eukaryotic host peptides.** The PRANC domain in WOVitA1's gwv\_1092 shares homology with multiple insect hosts. The best BLASTP hit for each species is listed above with E-value, query coverage and identity.

| EUKARYOTIC HOMOLOG          | ACCESSION      | E-VALUE  | QUERY COVERAGE | IDENTITY |
|-----------------------------|----------------|----------|----------------|----------|
| Microplitis demolitor       | XP_014298115.1 | 8.00E-43 | 75%            | 49%      |
| Nasonia vitripennis         | XP_003426146.1 | 5.00E-23 | 76%            | 37%      |
| Glypta fumiferanae          | AKD28025.1     | 4.00E-21 | 71%            | 39%      |
| Trichogramma pretiosum      | XP_014232168.1 | 2.00E-16 | 73%            | 33%      |
| Ceratosolen solmsi marchali | XP_011505281.1 | 8.00E-15 | 69%            | 31%      |
| Copidosoma floridanum       | XP_014206311.1 | 3.00E-12 | 58%            | 32%      |
| Diaphorina citri            | XP_008470724.1 | 9.00E-10 | 49%            | 31%      |
